# Supplementary material for: HIV signaling through CD4 and CCR5 activates Rho family GTPases that are required for optimal infection of primary CD4+ T cells
Source: PubMed Central journal article supplement (PMC5259950; doi:10.1186/s12977-017-0328-7), 2017-01-24
Supplement: 12977_2017_328_MOESM1_ESM.pdf [file 12977_2017_328_MOESM1_ESM.pdf]

Supplemental Table 1

**Epigenetic Screening Library. A.** Small molecule inhibitors tested with the combination reporter virus system. All compounds were initially tested with an assigned identifier (left column) to remove result bias. Listed half-maximal inhibitory concentrations (IC<sub>50</sub>) were compiled from previously published studies.

| Identifier | Compound Name                    | Reported or predicted IC50s                   | Identifier | Compound Name                        | Reported or predicted IC50s               |
|------------|----------------------------------|-----------------------------------------------|------------|--------------------------------------|-------------------------------------------|
| A2         | 3-Amino Benzamide                | 1.8 μM                                        | E2         | Sirtinol                             | 38 (SIRT2) / 131 μM (SIRT1)               |
| A3         | Ellagic Acid                     | 600-700 nM                                    | E3         | (-)-Neplanocin A                     | 80 nM                                     |
| A4         | UNC0638                          | <15 nM                                        | E4         | Zebularine                           | IC20 = 5-20 μM                            |
| A5         | Decitabine                       | 438 nM                                        | E5         | AG-014699                            | N/A                                       |
| A6         | Lomeguatrib                      | 3 nM                                          | E6         | GSK-J4 (HCl)                         | >50 μM                                    |
| A7         | Tenovin-6                        | 21 μM (SIRT1) / 10 μM (SIRT2) / 67 μM (SIRT3) | E7         | CAY10603                             | .002 nM - 7 μM                            |
| A8         | M 344                            | 46 nM                                         | E8         | Pimelic Diphenylamide 106            | 150 nM - 5 μM (HDAC 1) / 180 μM (HDAC II) |
| A9         | 2',3',5'-triacetyl-5-Azacytidine | 200 nM                                        | E9         | 3-Deazaneplanocin A                  | 0.2-1 μM                                  |
| A10        | trans-Resveratrol                | 15 μM (peroxidase) / 3.7 μM (COX-1)           | E10        | CAY10398                             | 10 μM                                     |
| A11        | CAY10591                         | 20-60 μM                                      | E11        | 1-Naphthoic Acid                     | N/A                                       |
| B2         | SB 939                           | 77 nM                                         | F2         | C646                                 | 1.6 μM                                    |
| B3         | Suberoyldioxamic Acid            | 250-300 nM                                    | F3         | Cl-Amidine                           | 5.9 μM                                    |
| B4         | Isoliquiritigenin                | 1.8 μM                                        | F4         | Delphinidin Chloride                 | 30 μM                                     |
| B5         | (+)-JQ1                          | 18-77 nM                                      | F5         | IOX1                                 | 1.7-20.5 μM                               |
| B6         | Daminozide                       | 500 nM - 2.1 μM                               | F6         | GSK-J5 (HCl)                         | >100 μM                                   |
| B7         | Sodium Butyrate                  | 300-400 nM                                    | F7         | Chaetocin                            | 0.8-3 μM                                  |
| B8         | Oxamflatin                       | 15.7 nM                                       | F8         | (S)-HDAC-42                          | N/A                                       |
| B9         | S-Adenosylhomocysteine           | N/A                                           | F9         | N-Oxalylglycine                      | 2.1-5.6 μM (PHD1/2)                       |
| B10        | 2,4-DPD                          | N/A                                           | F10        | 2,4-Pyridinedicarboxylic Acid        | 1.5 μM                                    |
| B11        | EX-527                           | 98 nM                                         | F11        | Nicotinamide                         | N/A                                       |
| C2         | PCI 34051                        | 10 nM                                         | G2         | Tubastatin A (trifluoroacetate Salt) | 15 nM (HDAC6)                             |
| C3         | Apicidin                         | 15.8 nM - 2 μM                                | G3         | F-Amidine (trifluoroacetate Salt)    | 21.6 μM                                   |
| C4         | CCG-100602                       | 9.8 μM                                        | G4         | PFI-1                                | 98 nM (BRD2) / 0.22 μM (BRD4)             |
| C5         | (-)-JQ1                          | N/A                                           | G5         | MI-2 (HCl)                           | 0.45 μM                                   |
| C6         | GSK-J1 (sodium salt)             | 60 nM - 56 μM                                 | G6         | Valproic Acid (Sodium Salt)          | 2 mM                                      |
| C7         | Anacardic Acid                   | 5-8.5 μM                                      | G7         | Splitomicin                          | 60 μM (SIR2p)                             |
| C8         | Salermide                        | 20 μM                                         | G8         | MS-275                               | 300 nM (HDAC-1)                           |
| C9         | UNC0224                          | 15 nM                                         | G9         | AMI-1 (sodium salt)                  | 3-8.8 μM                                  |
| C10        | DMOG                             | 0.1-1 mM                                      | G10        | CAY10433                             | 30 μM                                     |
| C11        | SAHA                             | 50 nM                                         | G11        | Sinefungin                           | 0.1-20 μM                                 |
| D2         | 4-iodo-SAHA                      | ~ 1 μM                                        | H2         | Garcinol                             | 7 μM (p300) / 5 μM (PCAF)                 |
| D3         | UNC0321 (trifluoroacetate salt)  | 6-9 nM                                        | H3         | JBG1741                              | N/A                                       |
| D4         | CAY10669                         | 662 μM                                        | H4         | 5-Azacytidine                        | .2μM                                      |
| D5         | BSI-201                          | 40-128 μM                                     | H5         | MI-negative control(HCl)             | 193 μM                                    |
| D6         | GSK-J2                           | >100 μM                                       | H6         | Tenovin-1                            | 10μM                                      |
| D7         | AGK2                             | 3.5 μM                                        | H7         | CBHA                                 | 10-7 nM                                   |
| D8         | Mirin                            | 66 μM                                         | H8         | RG-108                               | 115 nM                                    |
| D9         | Chidamide                        | 4 μM                                          | H9         | UNC1215                              | 40 nM                                     |
| D10        | Trichostatin A                   | 70 nM                                         | H10        | Piceatannol                          | 25 μM                                     |
| D11        | 2-PCPA (HCl)                     | 20.7 μM                                       | H11        | Suramin (sodium salt)                | 4.9 μM                                    |
